# Supplementary material
Source: PubMed Central journal article supplement (PMC5710391)
Supplement: jamaophthalmol-135-1259-s001.pdf [file jamaophthalmol-135-1259-s001.pdf]

|     |                                                                                                                                                                                                                                                                                                                                                                                                                                                                                                                                                                                                                                                                                                                                                                                                                                                                                                                                                                                                                                                                                                                                                                                                                                                                                                                                                                                                                                                                                                                                                                                                                                                                                                                                                                                                                                                                                                                                                                                                                                                                                                                                                                                                                                                                                                                                                                                                                                                                                                                                                                                                                                                                                                                                                                                                                                                                                                                                                                                                                                                                                                                                                  |                                    |
|-----|--------------------------------------------------------------------------------------------------------------------------------------------------------------------------------------------------------------------------------------------------------------------------------------------------------------------------------------------------------------------------------------------------------------------------------------------------------------------------------------------------------------------------------------------------------------------------------------------------------------------------------------------------------------------------------------------------------------------------------------------------------------------------------------------------------------------------------------------------------------------------------------------------------------------------------------------------------------------------------------------------------------------------------------------------------------------------------------------------------------------------------------------------------------------------------------------------------------------------------------------------------------------------------------------------------------------------------------------------------------------------------------------------------------------------------------------------------------------------------------------------------------------------------------------------------------------------------------------------------------------------------------------------------------------------------------------------------------------------------------------------------------------------------------------------------------------------------------------------------------------------------------------------------------------------------------------------------------------------------------------------------------------------------------------------------------------------------------------------------------------------------------------------------------------------------------------------------------------------------------------------------------------------------------------------------------------------------------------------------------------------------------------------------------------------------------------------------------------------------------------------------------------------------------------------------------------------------------------------------------------------------------------------------------------------------------------------------------------------------------------------------------------------------------------------------------------------------------------------------------------------------------------------------------------------------------------------------------------------------------------------------------------------------------------------------------------------------------------------------------------------------------------------|------------------------------------|
| 1   | Promotion : CHU de Bordeaux                                                                                                                                                                                                                                                                                                                                                                                                                                                                                                                                                                                                                                                                                                                                                                                                                                                                                                                                                                                                                                                                                                                                                                                                                                                                                                                                                                                                                                                                                                                                                                                                                                                                                                                                                                                                                                                                                                                                                                                                                                                                                                                                                                                                                                                                                                                                                                                                                                                                                                                                                                                                                                                                                                                                                                                                                                                                                                                                                                                                                                                                                                                      |                                    |
| 2   | Drug used : Nutrof ® Total                                                                                                                                                                                                                                                                                                                                                                                                                                                                                                                                                                                                                                                                                                                                                                                                                                                                                                                                                                                                                                                                                                                                                                                                                                                                                                                                                                                                                                                                                                                                                                                                                                                                                                                                                                                                                                                                                                                                                                                                                                                                                                                                                                                                                                                                                                                                                                                                                                                                                                                                                                                                                                                                                                                                                                                                                                                                                                                                                                                                                                                                                                                       |                                    |
| 3   | Active substances: 5 mg de Lutein and 1 mg Zeaxanthin per capsule                                                                                                                                                                                                                                                                                                                                                                                                                                                                                                                                                                                                                                                                                                                                                                                                                                                                                                                                                                                                                                                                                                                                                                                                                                                                                                                                                                                                                                                                                                                                                                                                                                                                                                                                                                                                                                                                                                                                                                                                                                                                                                                                                                                                                                                                                                                                                                                                                                                                                                                                                                                                                                                                                                                                                                                                                                                                                                                                                                                                                                                                                |                                    |
| 4   | Full title of the research : Lutein Influence on Macula of Persons Issued from Amd parents                                                                                                                                                                                                                                                                                                                                                                                                                                                                                                                                                                                                                                                                                                                                                                                                                                                                                                                                                                                                                                                                                                                                                                                                                                                                                                                                                                                                                                                                                                                                                                                                                                                                                                                                                                                                                                                                                                                                                                                                                                                                                                                                                                                                                                                                                                                                                                                                                                                                                                                                                                                                                                                                                                                                                                                                                                                                                                                                                                                                                                                       |                                    |
| 5   | Investigator(s) <sup>1</sup> : Coordination : Professor Jean-François Korobelnik.                                                                                                                                                                                                                                                                                                                                                                                                                                                                                                                                                                                                                                                                                                                                                                                                                                                                                                                                                                                                                                                                                                                                                                                                                                                                                                                                                                                                                                                                                                                                                                                                                                                                                                                                                                                                                                                                                                                                                                                                                                                                                                                                                                                                                                                                                                                                                                                                                                                                                                                                                                                                                                                                                                                                                                                                                                                                                                                                                                                                                                                                |                                    |
| 6   | Sites of research:<br>- Center 1 : CHU de Bordeaux<br>- Center 2 : CHU de Dijon                                                                                                                                                                                                                                                                                                                                                                                                                                                                                                                                                                                                                                                                                                                                                                                                                                                                                                                                                                                                                                                                                                                                                                                                                                                                                                                                                                                                                                                                                                                                                                                                                                                                                                                                                                                                                                                                                                                                                                                                                                                                                                                                                                                                                                                                                                                                                                                                                                                                                                                                                                                                                                                                                                                                                                                                                                                                                                                                                                                                                                                                  |                                    |
| 7   | Publications <sup>3</sup> :                                                                                                                                                                                                                                                                                                                                                                                                                                                                                                                                                                                                                                                                                                                                                                                                                                                                                                                                                                                                                                                                                                                                                                                                                                                                                                                                                                                                                                                                                                                                                                                                                                                                                                                                                                                                                                                                                                                                                                                                                                                                                                                                                                                                                                                                                                                                                                                                                                                                                                                                                                                                                                                                                                                                                                                                                                                                                                                                                                                                                                                                                                                      |                                    |
| 8   | Duration of research:                                                                                                                                                                                                                                                                                                                                                                                                                                                                                                                                                                                                                                                                                                                                                                                                                                                                                                                                                                                                                                                                                                                                                                                                                                                                                                                                                                                                                                                                                                                                                                                                                                                                                                                                                                                                                                                                                                                                                                                                                                                                                                                                                                                                                                                                                                                                                                                                                                                                                                                                                                                                                                                                                                                                                                                                                                                                                                                                                                                                                                                                                                                            | 9. Phase of clinical research : NA |
| 8.1 | - first inclusion: 21/DEC/2010                                                                                                                                                                                                                                                                                                                                                                                                                                                                                                                                                                                                                                                                                                                                                                                                                                                                                                                                                                                                                                                                                                                                                                                                                                                                                                                                                                                                                                                                                                                                                                                                                                                                                                                                                                                                                                                                                                                                                                                                                                                                                                                                                                                                                                                                                                                                                                                                                                                                                                                                                                                                                                                                                                                                                                                                                                                                                                                                                                                                                                                                                                                   |                                    |
| 8.2 | - last visit of last patient: 18/JAN/2013                                                                                                                                                                                                                                                                                                                                                                                                                                                                                                                                                                                                                                                                                                                                                                                                                                                                                                                                                                                                                                                                                                                                                                                                                                                                                                                                                                                                                                                                                                                                                                                                                                                                                                                                                                                                                                                                                                                                                                                                                                                                                                                                                                                                                                                                                                                                                                                                                                                                                                                                                                                                                                                                                                                                                                                                                                                                                                                                                                                                                                                                                                        |                                    |
| 10  | <p><b>PRIMARY OBJECTIVE</b><br/>To evaluate the efficacy of 6 months of food supplementation with lutein, zeaxanthin and Omegas 3 to increase the density of the macular pigment at 6 months in subjects at risk of genetic AMD (1st generation from parents affected of AMD).</p> <p><b>SECONDARY OBJECTIVES</b></p> <ul style="list-style-type: none"> <li>- To evaluate the efficacy of 6 months of food supplementation with lutein, zeaxanthin and Omegas 3 to increase the plasma level of Lutein and Zeaxanthin in subjects at risk for genetic AMD (1st generation from affected parents Of AMD).</li> <li>- Measure the initial density of the macular pigment by two methods: autofluorescence and reflectivity; Thanks to 2 measuring instruments (HRA and Visucam) in the center of Dijon and 3 measuring devices (HRA, Visucam and Maculux) in the center of Bordeaux, before any supplementation.</li> <li>- To evaluate the efficacy on the density of the macular pigment after 3 months of supplementation, by the same methods.</li> <li>- To evaluate the efficacy on the density of the macular pigment after 3 and 6 months of stop for the 2 groups treated, and also for the placebo group</li> <li>- Assess the effect of supplementation on plasma cholesterol levels, triglycerides, lutein and zeaxanthin after 3 and 6 months of supplementation.</li> <li>- Measure the evolution of plasma levels of lutein and zeaxanthin, after 3 and 6 months of supplementation stop</li> <li>- Evaluate the correlation between pigment measurements and the clinical form of AMD in the parent (FO photos already present in our files)</li> <li>- Evaluate the changes of the fundus of the eye at the beginning and during the follow-up of the study (evaluated on retinophotos color and OCT Spectralis)</li> <li>- Evaluate the modification of the visual acuity with correction, measured at 4 meters with the ETDRS scale, and the vision of the contrasts.</li> <li>- Evaluate the efficacy of supplementation on cognitive tests, after 3 and 6 months of supplementation.</li> <li>- Measure the evolution of cognitive tests, after 3 and 6 months of supplementation stop.</li> <li>- Assess the general tolerance,</li> <li>- Describe the age, history of smoking, HTA (and possible treatments), height, weight, previous consumption of fatty acids (DHA in particular, with a food questionnaire on oils consumed and fish).</li> <li>- Describe the AMD Phenotype of the parent (s) (followed in the service)</li> <li>- Describe the genetic profile in relation to the genes identified as risk factors for AMD in the subjects included.</li> </ul> <p>- Measurement of plasma fatty acids to:</p> <ul style="list-style-type: none"> <li>• To evaluate the efficacy of supplementation on plasma omega 3 levels after 3 and 6 months of supplementation</li> <li>• Measure the evolution of plasma levels of omega 3 fatty acids, after 3 and 6 months of supplementation stop</li> </ul> <p>To evaluate the correlation between plasma levels of omega-3 fatty acids and macular pigment density</p> |                                    |

<sup>1</sup> Si la recherche est multicentrique, indiquer le ou les noms des investigateurs coordonnateurs et le nombre total d'investigateurs.

<sup>3</sup> Préciser dans l'ordre : le nom des auteurs, le titre de la publication, le nom de la revue, l'année, le numéro du tome, les pages concernées.

|      |                                                                                                                                                                                                                                                                                                                                                                                                                                                                                                                                                                                                                                                                                                                                                                                                                                                                                                                                                                                                                                                                                                                                                                                                                                                                                                                                                                                                                                                                                                                                                                                                                                                                                                                                                                                                                                                                                                                                                                                                                                                         |
|------|---------------------------------------------------------------------------------------------------------------------------------------------------------------------------------------------------------------------------------------------------------------------------------------------------------------------------------------------------------------------------------------------------------------------------------------------------------------------------------------------------------------------------------------------------------------------------------------------------------------------------------------------------------------------------------------------------------------------------------------------------------------------------------------------------------------------------------------------------------------------------------------------------------------------------------------------------------------------------------------------------------------------------------------------------------------------------------------------------------------------------------------------------------------------------------------------------------------------------------------------------------------------------------------------------------------------------------------------------------------------------------------------------------------------------------------------------------------------------------------------------------------------------------------------------------------------------------------------------------------------------------------------------------------------------------------------------------------------------------------------------------------------------------------------------------------------------------------------------------------------------------------------------------------------------------------------------------------------------------------------------------------------------------------------------------|
|      | before and after supplementation.                                                                                                                                                                                                                                                                                                                                                                                                                                                                                                                                                                                                                                                                                                                                                                                                                                                                                                                                                                                                                                                                                                                                                                                                                                                                                                                                                                                                                                                                                                                                                                                                                                                                                                                                                                                                                                                                                                                                                                                                                       |
| 11   | Research methodology <sup>4</sup> : Randomized, double-blind, multicentre, stratified clinical trial on 2 parallel groups.                                                                                                                                                                                                                                                                                                                                                                                                                                                                                                                                                                                                                                                                                                                                                                                                                                                                                                                                                                                                                                                                                                                                                                                                                                                                                                                                                                                                                                                                                                                                                                                                                                                                                                                                                                                                                                                                                                                              |
| 12   | Number of participants involved in the research:                                                                                                                                                                                                                                                                                                                                                                                                                                                                                                                                                                                                                                                                                                                                                                                                                                                                                                                                                                                                                                                                                                                                                                                                                                                                                                                                                                                                                                                                                                                                                                                                                                                                                                                                                                                                                                                                                                                                                                                                        |
| 12.1 | - number of people planned: 120                                                                                                                                                                                                                                                                                                                                                                                                                                                                                                                                                                                                                                                                                                                                                                                                                                                                                                                                                                                                                                                                                                                                                                                                                                                                                                                                                                                                                                                                                                                                                                                                                                                                                                                                                                                                                                                                                                                                                                                                                         |
| 12.2 | - number of people analyzed: 120                                                                                                                                                                                                                                                                                                                                                                                                                                                                                                                                                                                                                                                                                                                                                                                                                                                                                                                                                                                                                                                                                                                                                                                                                                                                                                                                                                                                                                                                                                                                                                                                                                                                                                                                                                                                                                                                                                                                                                                                                        |
| 13   | <p>Medical condition or pathology studied and main inclusion and non inclusion criteria:<br/> <b>MEDICAL CONDITION:</b> subjects at risk of genetically related age-related macular degeneration (AMD) (1st generation from parents with AMD).</p> <p><b>INCLUSION CRITERIA</b></p> <ul style="list-style-type: none"> <li>- Men or women aged 40 to 70 years,</li> <li>- Have a documented history of AMD in their father or mother or both</li> <li>- Minimum visual acuity of 20/25 in ETDRS</li> <li>- The presence of AMD on one eye is possible.</li> <li>- Free, informed and written consent, dated and signed by the participant and the investigator before any examination required by the research.</li> <li>- subject accepting to be registered in the national file.</li> <li>- Affiliate or beneficiary of a social security scheme.</li> </ul> <p><b>CRITERIA OF EXCLUSION</b></p> <ul style="list-style-type: none"> <li>- Presence of signs of AMD in both eyes (if DMLA to one eye, possible inclusion for one eye)</li> <li>- History of other progressive ocular pathologies likely to complicate the assessment of age-related macular degeneration and visual acuity (severe glaucoma, strong myopia (greater than or equal to - 6 diopters), other severe retinopathy ...)</li> <li>- Cataract surgery</li> <li>- Opacity preventing the evaluation of photographs of the retina (cataract, corneal dystrophy ...),</li> <li>- Taking of food supplements in the previous year (list of supplements in France: Nutrof, Preservision, Occuvit, I-caps, Vitalux, Naturophtha, Maculophta, Oenobiol solar ... See complete list in appendix 2)</li> <li>- Participation in another clinical trial within the previous 30 days,</li> <li>- Non-compliant subjects (ie not able to participate in all follow-up visits during the study year),</li> <li>- Subjects not covered by the French social security system,</li> <li>- subjects under judicial supervision</li> <li>- persons placed under safeguard of justice</li> </ul> |
| 14   | Investigational drug (s) studied <sup>5</sup> (name, dose, route of administration and lot numbers): Nutrof ® Total, 5 mg Lutein and 1 mg Zeaxanthin, oral, per capsule.                                                                                                                                                                                                                                                                                                                                                                                                                                                                                                                                                                                                                                                                                                                                                                                                                                                                                                                                                                                                                                                                                                                                                                                                                                                                                                                                                                                                                                                                                                                                                                                                                                                                                                                                                                                                                                                                                |
| 15   | Duration of treatment <sup>6</sup> : 6 months                                                                                                                                                                                                                                                                                                                                                                                                                                                                                                                                                                                                                                                                                                                                                                                                                                                                                                                                                                                                                                                                                                                                                                                                                                                                                                                                                                                                                                                                                                                                                                                                                                                                                                                                                                                                                                                                                                                                                                                                           |
| 16   | Reference drug (s) <sup>7</sup> (name, dose, route of administration and lot numbers), if applicable: NA                                                                                                                                                                                                                                                                                                                                                                                                                                                                                                                                                                                                                                                                                                                                                                                                                                                                                                                                                                                                                                                                                                                                                                                                                                                                                                                                                                                                                                                                                                                                                                                                                                                                                                                                                                                                                                                                                                                                                |
| 17   | Evaluation criteria :                                                                                                                                                                                                                                                                                                                                                                                                                                                                                                                                                                                                                                                                                                                                                                                                                                                                                                                                                                                                                                                                                                                                                                                                                                                                                                                                                                                                                                                                                                                                                                                                                                                                                                                                                                                                                                                                                                                                                                                                                                   |
| 17.1 | - efficacy: increased serum and retinal density in macular pigment - security: NA - other: NA                                                                                                                                                                                                                                                                                                                                                                                                                                                                                                                                                                                                                                                                                                                                                                                                                                                                                                                                                                                                                                                                                                                                                                                                                                                                                                                                                                                                                                                                                                                                                                                                                                                                                                                                                                                                                                                                                                                                                           |
| 17.2 |                                                                                                                                                                                                                                                                                                                                                                                                                                                                                                                                                                                                                                                                                                                                                                                                                                                                                                                                                                                                                                                                                                                                                                                                                                                                                                                                                                                                                                                                                                                                                                                                                                                                                                                                                                                                                                                                                                                                                                                                                                                         |
| 17.3 |                                                                                                                                                                                                                                                                                                                                                                                                                                                                                                                                                                                                                                                                                                                                                                                                                                                                                                                                                                                                                                                                                                                                                                                                                                                                                                                                                                                                                                                                                                                                                                                                                                                                                                                                                                                                                                                                                                                                                                                                                                                         |
| 18   | <p>Statistical analysis: The data were described using the usual statistics: mean, standard deviation (SD), first quartile (Q1), third quartile (Q3), minimum value (min), maximum value for quantitative variables and frequencies And percentages for qualitative or ordinal variables. Differences between treatment groups were analyzed using a general linear mixed model (fixed effect) with randomized interception adjusted for age, sex, body mass index (BMI), smoking and the center. The analyzes were based on the intention of processing, with the missing data = failure. The P values were set at &lt;0.05 for the statistical significance threshold.</p>                                                                                                                                                                                                                                                                                                                                                                                                                                                                                                                                                                                                                                                                                                                                                                                                                                                                                                                                                                                                                                                                                                                                                                                                                                                                                                                                                                            |
| 19   | Summary                                                                                                                                                                                                                                                                                                                                                                                                                                                                                                                                                                                                                                                                                                                                                                                                                                                                                                                                                                                                                                                                                                                                                                                                                                                                                                                                                                                                                                                                                                                                                                                                                                                                                                                                                                                                                                                                                                                                                                                                                                                 |
| 19.1 | - research findings The average age was 56.7 years with 71.7% of women. The mother of 97 subjects (80.8%) had neovascular AMD, with only 25 of the subjects's fathers (20.8%).                                                                                                                                                                                                                                                                                                                                                                                                                                                                                                                                                                                                                                                                                                                                                                                                                                                                                                                                                                                                                                                                                                                                                                                                                                                                                                                                                                                                                                                                                                                                                                                                                                                                                                                                                                                                                                                                          |
| 19.2 | - Results of the evaluation of effectiveness, if any: The blood samples taken confirmed the increase in plasma carotenoids after 3 and 6 months of follow-up in the supplementation group. In addition, serum concentrations of Lutein and Zeaxanthin are correlated with oral administration of lutein, zeaxanthin,                                                                                                                                                                                                                                                                                                                                                                                                                                                                                                                                                                                                                                                                                                                                                                                                                                                                                                                                                                                                                                                                                                                                                                                                                                                                                                                                                                                                                                                                                                                                                                                                                                                                                                                                    |
| 19.3 | omega-3 fatty acids and antioxidants for 6 months. Measurements of macular pigment density using either HRA-modified (Heidelberg) or Visucam 200 MPD (Carl Zeiss Meditec) did not demonstrate a significant increase in macular pigment density in the treated group Relative to the control group.                                                                                                                                                                                                                                                                                                                                                                                                                                                                                                                                                                                                                                                                                                                                                                                                                                                                                                                                                                                                                                                                                                                                                                                                                                                                                                                                                                                                                                                                                                                                                                                                                                                                                                                                                     |
|      | - Safety assessment results, if applicable: NA                                                                                                                                                                                                                                                                                                                                                                                                                                                                                                                                                                                                                                                                                                                                                                                                                                                                                                                                                                                                                                                                                                                                                                                                                                                                                                                                                                                                                                                                                                                                                                                                                                                                                                                                                                                                                                                                                                                                                                                                          |
|      | - Conclusion: The LIMPIA study did not show a significant difference in MPD after oral supplementation of Lutein + Zeaxanthin after 6 months of treatment despite the increase in plasma levels of Lutein and Zeaxanthin in first generation subjects from parents with AMD . Further research is needed to better evaluate the density of macular pigments and to understand the cellular uptake and metabolism of these                                                                                                                                                                                                                                                                                                                                                                                                                                                                                                                                                                                                                                                                                                                                                                                                                                                                                                                                                                                                                                                                                                                                                                                                                                                                                                                                                                                                                                                                                                                                                                                                                               |

|    |                                                                                                                                                   |
|----|---------------------------------------------------------------------------------------------------------------------------------------------------|
|    | nutrients in the macula                                                                                                                           |
| 20 | Date du report : 02/JAN/2017                                                                                                                      |
| 21 | Number EudraCT : 2010-A00263-36                                                                                                                   |
| 22 | Date of transmission of report : 04/01/2017<br>Signature :<br>Name / capacity: Mr Joaquin Martinez - Director of Clinical Research and Innovation |
