# Supplementary material
Source: PubMed Central journal article supplement (PMC5710391)
Supplement: jamaophthalmol-135-1259-s002.pdf [file jamaophthalmol-135-1259-s002.pdf]

## Supplementary Online Content

Korobelnik J-F, Rougier M-B, Delyfer M-N, et al. Effect of dietary supplementation with lutein, zeaxanthin, and  $\omega$ -3 on macular pigment: a randomized clinical trial. *JAMA Ophthalmol*. Published online September 28, 2017. doi:10.1001/jamaophthalmol.2017.3398

**eTable 1.** Macular Pigment Optical Density (Modified HRA) Within Each Eccentricity

**eTable 2.** Macular Pigment Optical Density (MPD Visucam)

This supplementary material has been provided by the authors to give readers additional information about their work.

**eTable 1. Macular Pigment Optical Density (Modified HRA) Within Each Eccentricity**

|                                 |       | <b>L+Z<br/>(N=119)</b> | <b>Placebo<br/>(N=120)</b> | <b>Between group<br/>differences* (L+Z –<br/>placebo)</b> |                |
|---------------------------------|-------|------------------------|----------------------------|-----------------------------------------------------------|----------------|
|                                 |       |                        |                            | <b>E [IC95%]</b>                                          | <b>P value</b> |
| Baseline value,<br>mean±std (n) |       |                        |                            |                                                           |                |
|                                 | 0.51° | 0.60±0.16<br>(116)     | 0.62±0.19 (117)            |                                                           |                |
|                                 | 0.98° | 0.55±0.13<br>(116)     | 0.56±0.18 (117)            |                                                           |                |
|                                 | 1.99° | 0.41±0.09<br>(116)     | 0.41±0.13 (117)            |                                                           |                |
|                                 | 6°    | 0.17±0.04<br>(116)     | 0.17±0.06 (115)            |                                                           |                |
| M3-D0,<br>mean±std (n)          | 0.51° | 0.04±0.15<br>(114)     | 0.03±0.16 (107)            | -0.002 [-0.043 ;<br>0.039]                                | 0.92           |
|                                 | 0.98° | 0.03±0.12<br>(114)     | 0.03±0.13 (107)            | -0.004 [-0.038;<br>0.029]                                 | 0.80           |
|                                 | 1.99° | 0.17±0.11<br>(114)     | 0.18±0.12 (107)            | -0.011 [-0.043;<br>0.022]                                 | 0.52           |
|                                 | 6°    | 0.00±0.04<br>(114)     | 0.01±0.04 (105)            | -0.006 [-0.018;<br>0.006]                                 | 0.35           |
| M6-D0,<br>mean±std (n)          | 0.51° | 0.05±0.18<br>(108)     | 0.03±0.19 (107)            | 0.020 [-0.038<br>;0.077]                                  | 0.52           |
|                                 | 0.98° | 0.05±0.15<br>(108)     | 0.03±0.16 (107)            | 0.023[-0.026;<br>0.071]                                   | 0.36           |
|                                 | 1.99° | 0.20±0.14<br>(108)     | 0.18±0.14 (107)            | 0.016 [-0.029;<br>0.062]                                  | 0.48           |
|                                 | 6°    | 0.02±0.05<br>(108)     | 0.00±0.06(105)             | 0.005 [-0.011;<br>0.021]                                  | 0.52           |
| M9-D0,<br>mean±std (n)          | 0.51° | 0.04±0.17<br>(104)     | 0.02±0.19 (103)            | 0.009 [-0.042;<br>0.060]                                  | 0.73           |

|                         |       |                    |                 |                           |      |
|-------------------------|-------|--------------------|-----------------|---------------------------|------|
|                         | 0.98° | 0.04±0.14<br>(104) | 0.02±0.17 (103) | 0.007 [-0.038 ;<br>0.052] | 0.76 |
|                         | 1.99° | 0.18±0.13<br>(104) | 0.17±0.16 (103) | -0.001 [-0.047;<br>0.044] | 0.94 |
|                         | 6°    | 0.01±0.04<br>(104) | 0.01±0.06 (102) | 0.000 [-0.014;<br>0.015]  | 0.95 |
| M12-D0,<br>mean±std (n) | 0.51° | 0.04±0.15<br>(111) | 0.01±0.17 (101) | 0.031 [-0.015;<br>0.078]  | 0.19 |
|                         | 0.98° |                    | 0.01±0.15 (101) |                           | 0.11 |
|                         | 1.99° | 0.04±0.13<br>(111) | 0.16±0.14 (101) | 0.032 [-0.008;<br>0.072]  | 0.22 |
|                         | 6°    | 0.18±0.12<br>(111) | 0.01±0.05 (99)  | 0.024 [-0.014;<br>0.062]  | 0.09 |
|                         |       | 0.02±0.04<br>(111) |                 | 0.011 [-0.002;<br>0.024]  |      |
| M12-D0,<br>mean±std (n) | 0.51° | 0.04±0.15<br>(111) | 0.01±0.17 (101) | 0.031 [-0.015;<br>0.078]  | 0.19 |
|                         | 0.98° | 0.04±0.13<br>(111) | 0.01±0.15 (101) | 0.032 [-0.008;<br>0.072]  | 0.11 |
|                         | 1.99° | 0.18±0.12<br>(111) | 0.16±0.14 (101) | 0.024 [-0.014;<br>0.062]  | 0.22 |
|                         | 6°    | 0.02±0.04<br>(111) | 0.01±0.05 (99)  | 0.011 [-0.002;<br>0.024]  | 0.09 |

\* Linear mixed model with random intercept adjusted for age, sex, BMI, smoking, and center.

E: estimate; IC95%: confidence interval; n: available data

**eTable 2. Macular Pigment Optical Density (MPD Visucam)**

|                                      | <b>L+Z<br/>(N=119)</b> | <b>Placebo<br/>(N=120)</b> | <b>Between group differences*<br/>(L+Z – placebo)</b> |                    |
|--------------------------------------|------------------------|----------------------------|-------------------------------------------------------|--------------------|
|                                      |                        |                            | <b>E [IC95%]</b>                                      | <b>P<br/>value</b> |
| <b>Volume</b>                        |                        |                            |                                                       |                    |
| Baseline value<br>(D0), mean±std (n) | 9199±1986<br>(118)     | 8271±2412<br>(120)         |                                                       |                    |
| M3-D0                                | -194±1520<br>(116)     | 212±1267<br>(112)          | -358 [-792.13;<br>75.39]                              | 0.10               |
| M6-D0                                | -654±2128<br>(114)     | -88±1667<br>(110)          | -457 [-1085.26;<br>171.70]                            | 0.15               |
| M9-D0                                | -965±2462<br>(110)     | -217±1759<br>(106)         | -667 [-1347.71;<br>12.55]                             | 0.05               |
| M12-D0                               | -785±1938<br>(114)     | -291±2337<br>(106)         | -393 [-1043.11;<br>256.54]                            | 0.23               |
| <b>Area</b>                          |                        |                            |                                                       |                    |
| Baseline value<br>(D0), mean±std (n) | 64921±10028<br>(118)   | 62294±10936<br>(120)       |                                                       |                    |
| M3-D0                                | -2162±8830<br>(116)    | 519±7918<br>(112)          | -2370 [-4840.83;<br>100.53]                           | 0.06               |
| M6-D0                                | -4460±10217<br>(114)   | -1533±9955<br>(110)        | -2371 [-5575.92;<br>833.90]                           | 0.15               |
| M9-D0                                | -6500±11643<br>(110)   | -1991±9650<br>(106)        | -4273 [-7467.32; -<br>1078.94]                        | 0.009              |
| M12-D0                               | -4520±10207<br>(114)   | -2727±9626<br>(106)        | -1628 [-4248.96;<br>992.91]                           | 0.22               |
| <b>Mean</b>                          |                        |                            |                                                       |                    |
| Baseline value<br>(D0), mean±std (n) | 0.14±0.02<br>(118)     | 0.13±0.02<br>(120)         |                                                       |                    |
| M3-D0                                | 0.01±0.01<br>(116)     | 0.01±0.01<br>(112)         | -0.001 [-0.005;<br>0.002]                             | 0.55               |
| M6-D0                                | -0.01±0.02<br>(114)    | 0.01±0.01<br>(110)         | -0.002 [-0.008;<br>0.003]                             | 0.35               |
| M9-D0                                | -0.01±0.02<br>(110)    | 0.01±0.02<br>(106)         | -0.002 [-0.009;<br>0.004]                             | 0.45               |
| M12-D0                               | -0.01±0.01<br>(114)    | 0.01±0.03<br>(106)         | -0.003 [-0.010;<br>0.004]                             | 0.43               |

|                                      |                     |                     |                           |      |
|--------------------------------------|---------------------|---------------------|---------------------------|------|
|                                      | (114)               | (106)               | 0.004]                    |      |
| <b>Maximum</b>                       |                     |                     |                           |      |
| Baseline value<br>(D0), mean±std (n) | 0.38±0.05<br>(118)  | 0.36±0.06<br>(120)  |                           |      |
| M3-D0                                | -0.01±0.03<br>(116) | 0.01±0.03<br>(112)  | -0.005 [-0.012;<br>0.003] | 0.21 |
| M6-D0                                | -0.01±0.03<br>(114) | -0.01±0.03<br>(110) | -0.002 [-0.013;<br>0.008] | 0.64 |
| M9-D0                                | -0.01±0.04<br>(110) | -0.00±0.06<br>(106) | -0.007 [-0.024;<br>0.009] | 0.38 |
| M12-D0                               | -0.02±0.04<br>(114) | -0.01±0.07<br>(106) | -0.012 [-0.032;<br>0.009] | 0.26 |

\* Linear mixed model with random intercept adjusted for age, sex, BMI, smoking, and center. E: estimate; IC95%: confidence interval  
n: available data
